1           **Sarcoptic mange outbreak decimates South American camelid populations in San**  
2                                                                   **Guillermo National Park, Argentina**

3

4

5   Hebe Ferreyra<sup>1</sup>, Jaime Rudd<sup>2,#a</sup>, Janet Foley<sup>2</sup>, Ralph E. T. Vanstreels<sup>3,6</sup>, Ana M. Martín<sup>4</sup>,  
6   Emiliano Donadio<sup>5,#b</sup>, Marcela M. Uhart<sup>6\*</sup>

7

8   <sup>1</sup>Administración de Parques Nacionales, Argentina

9   <sup>2</sup>Department of Medicine and Epidemiology, University of California, Davis, United States  
10   of America

11   <sup>3</sup>Institute of Research and Rehabilitation of Marine Animals (IPRAM), Brazil

12   <sup>4</sup>Departamento de Patología Animal, Universidad Católica de Córdoba, Argentina

13   <sup>5</sup>INBIOMA, CONICET, Argentina.

14   <sup>6</sup>One Health Institute, School of Veterinary Medicine, University of California, Davis,  
15   United States of America

16

17   <sup>#a</sup> Current Address: California Department of Fish and Wildlife, United States of America

18   <sup>#b</sup>: Current Address: Fundación Rewilding Argentina, Argentina

19

20

21   \*Corresponding author

22   E-mail: [muhart@ucdavis.edu](mailto:muhart@ucdavis.edu) (MU)

## 23 **Abstract**

24 Sarcoptic mange epidemics can devastate wildlife populations. In 2014, mange was first  
25 detected in vicuña (*Vicugna vicugna*) and guanaco (*Lama guanicoe*) in San Guillermo  
26 National Park (SGNP), Argentina. This study characterized the potential source and the  
27 impacts of the outbreak in 2017–2019. Transect surveys indicated a sharp decrease in the  
28 density of live vicuña and guanaco by 68% and 77%, respectively, from May 2017 to June  
29 2018. By April 2019 no vicuña or guanaco were recorded on transect surveys, suggesting a  
30 near-extinction at the local level. Clinical signs consistent with mange (e.g. intense pruritus,  
31 hyperkeratosis, alopecia) were observed in 24% of live vicuña (n = 478) and 33% of live  
32 guanaco (n = 12) during surveys, as well as in 94% of vicuña carcasses (n = 124) and 85%  
33 of guanaco carcasses (n = 20) opportunistically examined during the study period.  
34 Histological examination (n = 15) confirmed sarcoptic mange as the cause of the cutaneous  
35 lesions. Genetic characterization revealed that *Sarcoptes scabiei* recovered from seven  
36 vicuña (n = 13) and three guanaco (n = 11) shared the same genotype, which is consistent  
37 with a single source and recent origin of the epidemic. A governmental livestock incentive  
38 program introduced llama (*Lama glama*) in areas adjacent to SGNP in 2009, some of which  
39 reportedly had alopecic scaling consistent with sarcoptic mange. We hypothesize that the  
40 introduction of mange-infected llama may have triggered the outbreak in wild camelids  
41 which has now put them at a high risk of local extinction. This unprecedented event  
42 highlights that the accidental introduction of disease may be underestimated at the onset yet  
43 can have devastating effects on native ungulate populations with potentially profound  
44 effects at the community and ecosystem levels.

## Introduction

45 Emerging infectious diseases are caused by new pathogens or known pathogens that have  
46 recently increased their incidence or geographic distribution or have spread to new hosts  
47 [1]. In wild animals, such diseases have caused dramatic population declines, often leading  
48 to collapse and local extinction [1-5]. An emerging disease of increasing relevance for  
49 wildlife is sarcoptic mange, a highly contagious skin disease of mammals caused by the  
50 mite *Sarcoptes scabiei*.

51

52 Sarcoptic mange has been reported in at least 12 orders, 39 families and 148 species of  
53 domestic and wild mammals [6]. *S. scabiei* induces skin hypersensitivity, inflammation,  
54 intense itching, pain, and hair loss [7, 8]. As the disease progresses, the skin thickens and  
55 develops deep fissures, impairing thermoregulation. In seasonal climates, this may lead to a  
56 negative energy balance, progressive emaciation, and limited ability to forage and evade  
57 predators [9, 10].

58

59 The epidemiology of sarcoptic mange can vary considerably in wild animals depending on  
60 the geographic region and host species [7, 8]. While in some regions and species sarcoptic  
61 mange is endemic [11], in other regions it can cause devastating epidemics, leading to  
62 drastic population declines [12, 13]. Some outbreaks have been linked to transmission  
63 between livestock and wildlife [11]. Lavín et al (2000) [14] were able to reproduce the  
64 disease experimentally in the Cantabrian chamois (*Rupicapra pyrenaica parva*) from mites  
65 recovered from domestic goats (*Capra aegagrus hircus*), supporting the hypothesis that  
66 domestic animals may serve as a source of infection. There is also circumstantial evidence

67 that the mange outbreaks that decimated Spanish ibex (*Capra pyrenaica hispanica*)  
68 likewise originated from domestic goats [12].  
69  
70 Sarcoptic mange is known to occur in wild South American camelids, vicuña (*Vicugna*  
71 *vicugna*) and guanaco (*Lama guanicoe*) [15-18]. However, information on the distribution  
72 and prevalence of this disease is extremely scarce, restricted to a low number of sites, and  
73 mostly reported in gray literature. In Argentina, both wild camelid species have suffered  
74 considerable retractions in their distribution and abundance due to hunting, competition  
75 with livestock, and habitat loss, resulting in reductions of up to 40% in the original  
76 distribution of guanaco and the near-extinction of vicuña in the mid-twentieth century [19].  
77 Currently, guanaco and vicuña are globally categorized as “Least Concern”, though some  
78 sub-populations are small, fragmented, and isolated, rendering them locally susceptible to  
79 stochastic events [20, 21].  
80  
81 San Guillermo National Park (SGNP) protects the largest sympatric vicuña and guanaco  
82 populations in Argentina and represents the southern limit of the distribution of vicuña  
83 [22]. In 2014, sarcoptic mange was diagnosed for the first time in both camelid species at  
84 SGNP. Soon thereafter, significant declines in the camelid populations were noticed as the  
85 number of affected animals increased [23]. The abrupt nature and rapid progression of the  
86 outbreak suggests a recent introduction of the causative pathogen [24, 25].  
87  
88 A governmental livestock incentive program introduced llama (*Lama glama*) in areas  
89 adjacent to SGNP in 2009 [26], some of which were diagnosed with mange, suggesting a  
90 potential link between the two events. Here, we explore the hypothesis of llama-sourced

91 infection by describing epidemiological aspects of the outbreak during 2017-19, genetically  
92 characterizing the mites, and analyzing the spatial and temporal overlap of the events.

93

## 94 **Materials and Methods**

### 95 **Study area**

96 San Guillermo National Park (SGNP) is in San Juan province, Argentina (29°4'12"S,  
97 69°21'0"W) (Fig 1) and covers 166,000 ha between 2,000 and 5,600 meters above sea level.  
98 San Guillermo Provincial Reserve (SGPR) (about 815,460 ha) surrounds SGNP to the  
99 northwest. Together, SGNP and SGPR make up San Guillermo Biosphere Reserve (SGBR)  
100 (Fig 1), which protects 981,460 ha of the Puna and High Andes eco-regions [22].

101

102 **Figure 1: Location of San Guillermo National Park and study transects in relation to**  
103 **the natural distribution of vicuña (*Vicugna vicugna*) and guanaco (*Lama guanicoe*)**  
104 **and nearby farms and grazing areas of livestock and recently introduced llama (*Lama***  
105 ***glama*).**

106

107 Rainfall is scarce with an average 240 mm per year, concentrated in January-March. The  
108 temperature range is -23 °C to 27 °C; January is the warmest (average 14 °C) and July the  
109 coldest month (average -1 °C) [27]. SGNP is characterized by extensive open plains (81%  
110 of the study area) located at 3,400 meters above sea level, surrounded by hills and mountain  
111 peaks. These plains are traversed by narrow canyons (10-300 m wide) with steep rocky  
112 walls representing 15% of the study area, and a few isolated flooded meadows within the

113 plains or on the riverbanks account for the remaining 4% of the study area [28]. Vicuña are  
114 ten times more abundant than guanaco in the park [29].

115

116 Vicuña and guanaco concentrate in high altitude meadows and plains [30], but guanaco  
117 migrate during the winter to low altitude areas, where they are exposed to goats and sheep  
118 and to a lesser extent, cattle [30]. In 2009, some farmers nearby SGNP received llamas  
119 (*Lama glama*) through a San Juan province governmental livestock incentive program  
120 ('Programa Camélidos de los Andes') [26]. A group of these animals were temporarily  
121 housed within SGPR, at Centro Operativo Lavadero (Fig 1, site 4).

122

## 123 **Population density and proportion of live individuals infected** 124 **with mange**

### 125 **Density**

126 After the onset of the sarcoptic mange outbreak in 2014, increasing prevalence of mange  
127 lesions and death of wild camelids were recorded in SGNP [23]. To estimate the density of  
128 remaining live vicuña and guanaco, in our study we conducted five field surveys in May,  
129 September and December 2017, and April and June 2018. In each survey we implemented  
130 four transects following park dirt roads: Llano de los Leones, Llano San Guillermo,  
131 Caserones and Agüita del Indio (Fig 1; further details provided in Table S1). We used  
132 binoculars (Tasco® 7 x 35 mm) and a telescope (Bushnell® 15-45 x 60 mm) to search for  
133 and observe animals and laser rangefinders (Bushnell® Elite 1500 and Bushnell® DX  
134 1000) to measure distances between the animals and the observer. We traveled transects at

135 a speed of 20 km/h. When we spotted animals, we stopped and observed them for 5-10 min  
136 to count them and confirm infection status. We travelled the transects twice at one day  
137 intervals and animals observed within 1,000 m on each side of the transect were counted.  
138 Along each transect, we recorded the distance from and the angle of the animal or group of  
139 animals to the transect. Densities were estimated using Distance 7.1 [31]. Due to small  
140 sample sizes, data were grouped by species in three periods covered by our study (May  
141 2017, September-December 2017 and April-June 2018) and no estimates could be obtained  
142 for September 2018 and April 2019. The probability of detection was calculated for each  
143 period and species, provided it reached a minimum of 60-80 observations [31]. Thus, for  
144 vicuña, detection probabilities were obtained for each of the three periods, while for  
145 guanaco they were obtained by grouping the data with those of vicuña due to low counts.

146

### 147 **Mange infection**

148 To quantify the proportion of live camelids with mange we conducted eight field surveys in  
149 February, May, September, and December 2017; April, June, and September 2018; and  
150 April 2019 (Table S1). We used the same transects but only evaluated individuals within  
151 200 m from the transect because of the unfeasibility of accurately identifying infected  
152 animals at distances  $\geq 200$  m. Because incipient infections are undetectable without  
153 handling the animals, our estimates represent the minimum infected proportion. We  
154 identified cases of sarcoptic mange when one or more of the following signs were  
155 observed: intense scratching, difficulty walking, thickening, crusty or cracked skin, and  
156 alopecia or ruffled or detached fiber. According to the clinical stage of disease, we used  
157 three categories: (A) early stage, only pruritus evident; (B) advanced stage, difficulty

158 walking and/or visible injuries to the limbs; and (C) severe stage (Fig 2 A, B and C),  
159 alopecia extending to several parts of the body. Because the categories represent increasing  
160 severity, each level includes the signs of the previous one. To avoid inter-observer bias, all  
161 observations were made by the same person (H. Ferreyra).

162

163 **Figure 2: Clinical stage of mange in live vicuña: (A) early stage, (B) advanced stage**  
164 **and (C) severe stage.**

165

## 166 **Mange infection in carcasses and mite collection**

167 Camelid carcasses found during opportunistic searches throughout SGNP from May 2017  
168 to June 2018 were evaluated for the presence of skin lesions consistent with mange.

169 Carcasses were recorded only if the remains included limbs with skin and skull. Examined  
170 carcasses were identified with a cattle marker pen, and the lower jaw was disarticulated to  
171 avoid double counts between surveys. Carcasses were classified as either mange positive or  
172 negative (severity was not determined), and when possible, lesions were scraped with a  
173 sterile surgical blade. Scrapings were preserved in two vials, one with mineral oil for  
174 microscopy and the other with 70% ethanol for genotyping [32]. *S. scabiei* was confirmed  
175 microscopically following standard guidelines [33]. Using a magnifying glass and  
176 watchmaker's tweezers, individual mites were recovered and placed in 70% ethanol.

177

178 Affected skin samples from fresh, whole carcasses, were also preserved in 10% formalin  
179 for histopathology. In these cases, body condition was estimated as good, poor and



180 emaciated according to [34] (2009). Tooth wear and replacement from the lower jaw teeth  
181 were used to determine age class (cria, juvenile and adult) [35].

182

## 183 **Tracing the outbreak source**

184 Based on the hypothesis that introduced llama were linked to the outbreak in wild camelids,  
185 we interviewed the veterinarians who worked in the governmental livestock incentive  
186 program that introduced llama to the study area. Interviewees were asked about the number,  
187 geographic origin, dates of arrival and health care and husbandry of the introduced llama  
188 over the duration of the program. Additional information included where llamas were  
189 initially housed, and whether mange was noted at any time. Likewise, llama breeders in  
190 proximity to the park were visited (Fig 1) and information was compiled on the current  
191 number of animals in their herds, whether they were corralled or allowed to graze freely  
192 during the day and confined at night, whether they had noticed signs of mange, and if they  
193 received clinical exams and preventive treatment for mange.

194

195 To assess whether mange had been historically detected in wild camelids in the area we  
196 posed the question “do you remember seeing or have you heard about mange in wildlife in  
197 this area in the last fifty years” to provincial and national park rangers, as well as to  
198 technicians from the Secretary of the Environment of San Juan province. The latter then  
199 extended the question to elderly farmers (>60 years) in the region when they were visited  
200 for other purposes.

201

## 202 **Statistical analysis**

203 The proportion of mange-infected individuals and their respective 95% confidence intervals  
204 (CI) were determined for both live and dead camelids. Because the abundance of guanaco  
205 is low at SGNP, further statistical analysis were conducted only for vicuña. Likelihood ratio  
206 chi-square tests were used to evaluate whether the proportion of vicuña with mange or the  
207 proportion of disease clinical stage categories were unevenly distributed relative to age  
208 classes (excluding “not determined”), transects and survey months. Binary logistic  
209 regression was used to evaluate whether age classes, transects and months were significant  
210 predictors of the proportion of live vicuña with mange. Multinomial logistic regression  
211 was used to evaluate whether age classes (reference category = adult; excluding “not  
212 determined”), transects (ref = Agüita del Indio) and survey months (ref = April 2018) were  
213 significant predictors of the different stages of mange (early, advanced, severe; reference  
214 category = without mange) of live vicuña. Odds ratios (OR) and their 95% confidence  
215 intervals were calculated for pairwise comparisons among categories of variables identified  
216 as significant (i.e. those where the OR CI interval did not include 1).

217

## 218 **Genetic characterization of mites**

219 The Micro DNA Extraction Kit (Qiagen, Valencia, CA) procedure was used for the  
220 preparation of mite DNA from a single *Sarcoptes* mite sample according to the  
221 manufacturer’s recommendations. Prior to individual DNA extraction, dead mites were  
222 pierced with an 18-gauge needle under a dissecting microscope and digested overnight in  
223 lysis buffer and proteinase K at 56 °C (Qiagen, Valencia, CA). Final DNA product from  
224 each mite was eluted in 60 µL of AE buffer. We selected 10 published microsatellite  
225 markers (SARMS 33-38, 40, 41, 44, and 45) [36] to genotype individual mites. Forward

226 primers were labeled with HEX or 6-FAM dye (Integrated DNA Technologies, Coralville,  
227 IA) and reconstituted into 100  $\mu$ M working dilutions. Primer pairs were combined into  
228 paired multiplex with 1.5 – 2.5  $\mu$ M of each primer. We performed PCR using the Qiagen  
229 2X Type-it Multiplex PCR Master Mix, 10X multiplex primer mix (2.5  $\mu$ L), DNA-free  
230 water (7  $\mu$ L), and 2-3  $\mu$ L DNA for a total reaction of 25  $\mu$ L. Thermocycling conditions  
231 were as published [36]. PCR products were transferred to 96-well plates (Biotix Inc, San  
232 Diego, CA) for electrophoresis and digital measurement of length polymorphisms on an  
233 ABI 3730 analyzer (Perkin-Elmer Davis, CA) using the program STRand (Veterinary  
234 Genetics Laboratory, University of California, Davis, CA;[37]). Microsatellite scoring and  
235 allele binning were performed with the R-package MsatAllele [38].

236

237 Data was reformatted using CREATE v1.37 [39], and descriptive statistics and diversity  
238 analyses were carried out with GenAlEx v. 6.2 [40], ML-Relate [41], and R package [42]  
239 (R Core Development Team 2018) PopGenReport [43] and poppr [44] to determine the  
240 number of private alleles, allele frequencies and expected ( $H_e$ ) and observed ( $H_o$ )  
241 heterozygosity, and also to test for Hardy–Weinberg equilibrium (HWE), and partitioned  
242 components of variance using analysis of molecular variance (AMOVA). To evaluate  
243 differentiation among the *S. scabiei* mite populations, we calculated the pairwise F-statistic.  
244 Possible errors in genotyping due to stuttering of large allele dropout were evaluated using  
245 MicroChecker v.2.2.0.3 [45]. Null alleles were estimated using ML-Relate. P-values  $\leq 0.05$   
246 were considered statistically significant.

247

## 248 **Results**

## 249 **Field data**

250 From May 2017 to June 2018, the population density declined from 8.89 to 2.87  
251 individuals/km<sup>2</sup> for vicuña (68% decrease) and from 0.26 to 0.06 individuals/km<sup>2</sup> for  
252 guanaco (77% decrease) at SGNP (Table 1). Figure 3 summarizes the temporal distribution  
253 of the number of camelids with and without mange recorded during transect surveys (live  
254 individuals) or opportunistically recorded (dead individuals). No guanaco were seen during  
255 mange-detection transect surveys ( $\geq 200$  m on both sides of transect) in June 2018,  
256 September 2018 and April 2019, and no vicuña were seen during these surveys in April  
257 2019.

258

259 **Table 1: Density (individuals/km<sup>2</sup>) of vicuña and guanaco at San Guillermo National**  
260 **Park, May 2017 – June 2018.**

| <b>Species</b> | <b>Period</b>  | <b>Density</b> | <b>Standard error</b> | <b>Coefficient of variation (%)</b> | <b>95% Confidence interval</b> | <b>Survey effort (km)</b> |
|----------------|----------------|----------------|-----------------------|-------------------------------------|--------------------------------|---------------------------|
| Vicuña         | May 2017       | 8.89           | 4.89                  | 54.52                               | 1.28 – 61.45                   | 28                        |
|                | Sep-Dec 2017   | 4.28           | 2.27                  | 53                                  | 0.92 – 19.89                   | 178.5                     |
|                | April-Jun 2018 | 2.87           | 0.84                  | 29.38                               | 1.44 – 5.75                    | 168.8                     |
| Guanaco        | May 2017       | 0.26           | 1.00                  | 97.48                               | 0.02 – 3.48                    | 28                        |
|                | Sep-Dec 2017   | 0.23           | 0.14                  | 63                                  | 0.06 – 13.96                   | 178.5                     |
|                | April-Jun 2018 | 0.06           | 0.02                  | 38.15                               | 0.02 – 0.42                    | 168.8                     |

262

263 **Figure 3: Time series of the number of live camelids observed in transect surveys and**  
264 **opportunistically collected carcasses with and without mange at San Guillermo**  
265 **National Park, February 2017 – April 2019. Asterisks indicate months when carcasses**  
266 **were not evaluated. Arrows represent field surveys where no individuals were**  
267 **recorded. Light shaded areas between bars are used to highlight the relative changes**  
268 **between field surveys (no data was collected in these intervals).**

269

270 During the study period, 24.1% (CI = 20.3 – 28.2; n = 478) of live vicuña met our case  
271 definition for mange (Table 2). Only twelve live guanaco were seen during transect  
272 surveys: (a) three individuals in February 2017 (two adults without mange at Llano San  
273 Guillermo, one adult with mange at Caserones), (b) eight individuals at Llano San  
274 Guillermo in May 2017 (one cria without mange, three adults with mange, four individuals  
275 of unknown age group without mange), and (c) one individual at Caserones in April 2018  
276 (without mange). The prevalence of mange in live guanaco was therefore 33.3% (CI = 9.9 –  
277 65.1; n = 12), and all cases were in the advanced-stage category.

278 **Table 2: Number and proportion of live vicuña with mange recorded during transect surveys at San Guillermo National Park,**  
 279 **February 2017 – April 2019.** The stages of clinical disease were categorized as: (A) early stage, only pruritus evident, (B) advanced  
 280 stage, difficulty walking and/or visible injuries to the limbs, and (C) severe stage, alopecia extending to several parts of the body.  
 281 Because the categories represent increasing severity, each level includes the signs of the previous one.

|                     | Individuals<br>examined | Individuals<br>with mange | Proportion<br>(95% CI)     | Early<br>stage  | Advanced<br>stage | Severe<br>stage |
|---------------------|-------------------------|---------------------------|----------------------------|-----------------|-------------------|-----------------|
| <i>Age class</i>    |                         |                           |                            |                 |                   |                 |
| Cria                | 86                      | 13                        | 15.1% (8.3 – 24.5)         | 10 (83%)        | 2 (17%)           | 0               |
| Juvenile            | 137                     | 37                        | 27% (19.8 – 35.3)          | 2 (5%)          | 22 (59%)          | 13 (35%)        |
| Adult               | 205                     | 59                        | 28.8% (22.7 – 35.5)        | 6 (11%)         | 35 (65%)          | 13 (24%)        |
| Not determined      | 50                      | 6                         | 12% (4.5 – 24.3)           | 1 (8%)          | 9 (75%)           | 2 (17%)         |
| <i>Month</i>        |                         |                           |                            |                 |                   |                 |
| February 2017       | 189                     | 42                        | 22.2% (16.5 – 28.8)        | 7 (17%)         | 19 (45%)          | 16 (38%)        |
| May 2017            | 70                      | 25                        | 35.7% (24.6 – 48.1)        | 7 (28%)         | 16 (64%)          | 2 (8%)          |
| September 2017      | 53                      | 24                        | 45.3% (31.6 – 59.6)        | 1 (4%)          | 18 (75%)          | 5 (21%)         |
| December 2017       | 35                      | 8                         | 22.9% (10.4 – 40.1)        | 2 (25%)         | 4 (50%)           | 2 (25%)         |
| April 2018          | 54                      | 6                         | 11.1% (4.2 – 22.6)         | 0               | 4 (67%)           | 2 (33%)         |
| June 2018           | 43                      | 8                         | 18.6% (8.4 – 33.4)         | 2 (25%)         | 5 (63%)           | 1 (13%)         |
| September 2018      | 34                      | 2                         | 5.9% (0.7 – 19.7)          | 0               | 2 (100%)          | 0               |
| April 2019          | 0                       |                           |                            |                 |                   |                 |
| <i>Transect</i>     |                         |                           |                            |                 |                   |                 |
| Llano de los Leones | 159                     | 54                        | 34% (26.7 – 41.9)          | 10 (19%)        | 28 (53%)          | 15 (28%)        |
| Agüita del Indio    | 184                     | 28                        | 15.2% (10.4 – 21.2)        | 1 (3%)          | 21 (72%)          | 7 (24%)         |
| Caserones           | 15                      | 4                         | 26.7% (7.8 – 55.1)         | 0               | 4 (100%)          | 0               |
| Llano San Guillermo | 120                     | 29                        | 24.2% (16.8 – 32.8)        | 8 (28%)         | 15 (52%)          | 6 (21%)         |
| <b>Total</b>        | <b>478</b>              | <b>115</b>                | <b>24.1% (20.3 – 28.2)</b> | <b>19 (17%)</b> | <b>68 (59%)</b>   | <b>28 (24%)</b> |

284 The overall proportion of live individuals with mange was similar in vicuña and guanaco  
285 (LRT = 0.511, df = 1, P = 0.475). The proportion of live vicuña with mange was  
286 significantly different between survey months (LRT = 31.72, df = 6, P < 0.001), transects  
287 (LRT = 16.65, df = 3, P = 0.001) and age classes (LRT = 6.747, df = 2, P = 0.034). Binary  
288 logistic regression indicated that only the survey month (P = 0.001) and transect (P < 0.001)  
289 were significant predictors of the proportion of live vicuña with mange, whereas age class  
290 was not (P = 0.163). Specifically, the pairwise comparisons revealed that live vicuña  
291 recorded in September 2017 were more likely to have mange than those recorded in  
292 February 2017 (OR = 4.02), April 2018 (OR = 11.26) and September 2018 (OR = 9.09)  
293 (95% CIs provided in Table S2). Additionally, live vicuña recorded at Caserones (OR =  
294 5.77), Llano de los Leones (OR = 4.59), and Llano San Guillermo (OR = 3.05) were more  
295 likely to have mange than those recorded at Agüita del Indio (95% CIs provided in Table  
296 S2).

297

298 Among live vicuña with mange, the proportion of individuals in each disease stage category  
299 varied significantly relative to the survey months (LRT = 50.77, df = 18, P < 0.001),  
300 transects (LRT = 22.81, df = 6, P < 0.001; “Caserones” omitted) and age classes (LRT =  
301 40.45, df = 6, P < 0.001) (Fig 2). Multinomial logistic regression for live vicuña revealed  
302 that: (a) cria were more likely to present early stage disease (OR = 4.86) and less likely to  
303 present advanced stage disease (OR=0.14) relative to adults; (b) individuals recorded in  
304 February 2017 were more likely to present advanced stage disease than those recorded in  
305 May 2017 (OR = 3.16), September 2017 (OR = 11.02) and June 2018 (OR = 7.85); and (c)  
306 individuals recorded at Agüita del Indio were less likely to present early stage disease than  
307 those recorded at Llano de los Leones (OR = 0.08) and Llano San Guillermo (OR = 0.06),

308 less likely to present advanced stage disease than those recorded at Caserones (OR = 0.08)  
309 and Llano de los Leones (OR = 0.22) and less likely to present severe stage disease than  
310 those recorded at Llano de los Leones (OR = 0.18) (95% CIs provided in Table S3).

311

312 Among opportunistically-collected carcasses, 93.5% of vicuña (CI = 87.7 – 97.2; n = 124)  
313 and 85.0% of guanaco (CI = 62.1 – 96.8, n = 20) met our case definition (Table 2). The  
314 overall proportion of dead individuals with mange was similar in vicuña and guanaco (LRT  
315 = 1.485, df = 1, P = 0.223). The proportion of dead vicuña with mange was similar among  
316 survey months (LRT = 4.725, df = 2, P = 0.094; “May 2017” and “June 2018” omitted) and  
317 age classes (LRT = 5.682, df = 2, P = 0.058) (Table 3). During carcass searches, only five  
318 animals (four vicuña and one guanaco), were found whole and fresh (recently predated by  
319 cougar *Puma concolor*). These carcasses presented with advanced clinical stage of mange,  
320 and all were in good body condition with good musculature.

321



322 **Table 3: Number and proportion of mange in examined vicuña and guanaco carcasses at San Guillermo National Park, May**  
 323 **2017 – June 2018.**

| Category         | Vicuña               |                        |                     | Guanaco              |                        |                     |
|------------------|----------------------|------------------------|---------------------|----------------------|------------------------|---------------------|
|                  | Individuals examined | Individuals with mange | Proportion (95% CI) | Individuals examined | Individuals with mange | Proportion (95% CI) |
| <i>Age class</i> |                      |                        |                     |                      |                        |                     |
| Cria             | 23                   | 19                     | 82.6% (61.2 – 95.1) | 1                    | 1                      | 100% (2.5 – 100)    |
| Juvenile         | 22                   | 20                     | 90.9% (70.8 – 98.9) | 2                    | 2                      | 100% (15.8 – 100)   |
| Adult            | 75                   | 73                     | 97.3% (90.7 – 99.7) | 15                   | 13                     | 86.7% (59.5 – 98.3) |
| Not determined   | 4                    | 4                      | 100% (39.8 – 100)   | 2                    | 1                      | 50% (1.3 – 98.7)    |
| <i>Month</i>     |                      |                        |                     |                      |                        |                     |
| May 2017         | 3                    | 3                      | 100% (29.2 – 100)   | 0                    |                        |                     |
| September 2017   | 33                   | 33                     | 100% (89.4 – 100)   | 7                    | 7                      | 100% (59 – 100)     |
| December 2017    | 63                   | 58                     | 92.1% (82.4 – 97.4) | 10                   | 8                      | 80% (44.4 – 97.5)   |
| April 2018       | 23                   | 21                     | 91.3% (72 – 98.9)   | 3                    | 2                      | 66.7% (9.4 – 99.2)  |
| June 2018        | 2                    | 1                      | 50% (1.3 – 98.7)    | 0                    |                        |                     |
| <b>Total</b>     | 124                  | 116                    | 93.5% (87.7 – 97.2) | 20                   | 17                     | 85% (62.1 – 96.8)   |

324

325

## 326 **Histological findings**

327 Histology from 14 vicuña and one guanaco carcasses revealed typical sarcoptic mange  
328 lesions with abundant mites in all specimens. Histological findings were consistent with  
329 chronicity such as hyperplasia of the epidermis and of sebaceous glands (15/15), collagen  
330 sclerosis (12/15), as well as acute changes like presence of inflammatory cells (neutrophils,  
331 eosinophils) and congested blood vessels in all cases (15/15, 100%) (Fig S1 A, B, C and  
332 D). Lesions identified as chronic histologically were more common in the axillary and  
333 inguinal regions of the body and coincided with areas where the greatest thickening of skin  
334 with crusts were observed macroscopically (Fig 4 A, B and C).

335

336 **Figure 4: (A) vicuña carcass: scabs and deep cracks in the axillary area; (B) vicuña**  
337 **carcass: scabs and deep cracks on hind limb; (C) guanaco carcass: scabs and deep**  
338 **cracks along the hind limb and groin.**

339

## 340 **Tracing the outbreak source**

341 Five veterinarians were interviewed. Four participated in the livestock incentive program  
342 (‘Camélidos de los Andes’) between 2009 and 2011. A fifth veterinarian runs a large-  
343 animal practice in the town of Rodeo, near SGNP (see Fig. 1). According to their records,  
344 156 llama entered San Juan province between 2009-2011 from Jujuy and Catamarca  
345 provinces (900 and 300 km north of San Juan, respectively). Veterinarians reported that  
346 llama were initially confined to a community pen in Rodeo where mange was detected in at  
347 least two animals upon arrival from Jujuy province in 2009 (Fig S2 A and B). Infected  
348 llama were treated with ivermectin. Llama were given to local farmers between 2009-2011.

349 About 15 llama that were not claimed by farmers were placed under temporary care of  
350 provincial park rangers at a ranger post, Centro Operativo Lavadero (Lavadero), within  
351 SGPR.

352

353 During our study period, seven facilities that housed llama were identified. All were private  
354 farms in Iglesias department (Fig 1). The farmer in Malimán (since 2009) and the rangers in  
355 Lavadero (mentioned above) allowed llama to graze freely. Llama in Lavadero were  
356 reportedly moving about 8 km to the northwest into SGNP on a daily basis, and in  
357 Malimán, their space use overlapped with that of guanaco. According to two interviewees,  
358 no mange was observed at these two sites, although there was no sustained veterinary care  
359 due to the expiration of the government program in 2013-2014.

360

361 Finally, the extended interviews revealed that in the last 20 years, there were no outbreaks  
362 of mange in non-camelid livestock in proximity of SGNP or SGBR. Likewise, there were  
363 no previous reports of sarcoptic mange outbreaks in wild camelids in the area at least in the  
364 last 50 years since SGPR was established.

365

## 366 **Mite characterization**

367 A total of 24 mites were selected for molecular identification from the skin scrapings of  
368 vicuña and guanaco; 13 mites collected from seven vicuña and 11 mites collected from  
369 three guanaco. Sixteen alleles were detected across 10 microsatellite loci. Depending on the  
370 loci, allele count ranged from one (SARM-36 and 38) to three (SARM-33 and 40). A total  
371 of 6 private alleles (i.e. alleles found only in one population and among the broader

372 collective populations of study) were detected and distributed among eight loci (SARM-33,  
 373 35, 37, and 40). The distribution and allele frequencies among populations of *S. scabiei*  
 374 mites according to the host is presented in Table 4.

375

376 **Table 4: Frequency of alleles by population. Distributions of allele frequencies in 10**  
 377 **microsatellite loci among *Sarcoptes scabiei* mite populations by host, vicuña and**  
 378 **guanaco (allele sizes are in base pairs). N is the number of mites collected and**  
 379 **genotyped from seven vicuña and three guanaco at each allele. Private alleles are**  
 380 **denoted with “†”.**

| Locus          | Allele     | Vicuña Mites       | Guanaco Mites      |
|----------------|------------|--------------------|--------------------|
| <b>SARM-33</b> | <b>N</b>   | <b>12</b>          | <b>11</b>          |
|                | <b>245</b> | 0.083 <sup>†</sup> | 0.000              |
|                | <b>247</b> | 0.875              | 1.000              |
|                | <b>274</b> | 0.042 <sup>†</sup> | 0.000              |
| <b>SARM-45</b> | <b>N</b>   | <b>13</b>          | <b>11</b>          |
|                | <b>194</b> | 1.000              | 1.000              |
| <b>SARM-35</b> | <b>N</b>   | <b>12</b>          | <b>11</b>          |
|                | <b>136</b> | 1.000              | 0.818              |
|                | <b>138</b> | 0.000              | 0.182 <sup>†</sup> |
| <b>SARM-38</b> | <b>N</b>   | <b>13</b>          | <b>11</b>          |
|                | <b>211</b> | 1.000              | 1.000              |
| <b>SARM-34</b> | <b>N</b>   | <b>13</b>          | <b>11</b>          |
|                | <b>209</b> | 1.000              | 1.000              |
| <b>SARM-44</b> | <b>N</b>   | <b>13</b>          | <b>11</b>          |
|                | <b>270</b> | 1.000              | 0.909              |
|                | <b>272</b> | 0.000              | 0.091 <sup>†</sup> |
| <b>SARM-40</b> | <b>N</b>   | <b>13</b>          | <b>11</b>          |
|                | <b>248</b> | 0.154 <sup>†</sup> | 0.000              |
|                | <b>250</b> | 0.846              | 1.000              |
| <b>SARM-41</b> | <b>N</b>   | <b>13</b>          | <b>11</b>          |
|                | <b>236</b> | 1.000              | 1.000              |
| <b>SARM-36</b> | <b>N</b>   | <b>13</b>          | <b>11</b>          |
|                | <b>272</b> | 1.000              | 1.000              |

| SARM-37 | N   | 13                 | 11    |
|---------|-----|--------------------|-------|
|         | 180 | 0.923              | 1.000 |
|         | 274 | 0.077 <sup>†</sup> | 0.000 |

381

382

383 Vicuña-derived mites had more total alleles detected overall ( $n = 14$ ) compared to mites  
 384 collected from guanaco ( $n = 12$ ); however, both mite-derived populations displayed  
 385 relatively low allelic richness ( $R_{\text{vicuña}} = 1.35$ ,  $R_{\text{guanaco}} = 1.19$ , Table 5). Further, mites from  
 386 vicuña and guanaco presented relatively few alleles with a low occurrence of  
 387 polymorphisms, 30% polymorphic loci in vicuña -derived mites and 20% in guanaco-  
 388 derived mites. Fixed alleles were detected for both vicuña and guanaco-derived mites at  
 389 SARM-34, 36, 38, 41, and 45 (Table S4). Fixed alleles were also observed for vicuña-  
 390 derived mites at SARM-35, 37, and 44, while additional fixed alleles for guanaco-derived  
 391 mites were detected at SARM-33 and 40. Values of expected ( $H_e$ ) and observed ( $H_o$ )  
 392 heterozygosity were also low for mites collected from vicuña ( $H_e = 0.063$ ,  $H_o = 0.024$ ) and  
 393 guanaco ( $H_e = 0.046$ ,  $H_o = 0.055$ ).

394

395 **Table 5: Characteristics of genetic variability of *Sarcoptes scabiei* obtained from**  
 396 **vicuña and guanaco carcasses in San Guillermo National Park.**

| Mite host           | No. of mites | R    | No. of polymorphic loci | $H_o$ | $H_e$ |
|---------------------|--------------|------|-------------------------|-------|-------|
| Vicuña ( $n = 7$ )  | 13           | 1.35 | 3                       | 0.024 | 0.063 |
| Guanaco ( $n = 3$ ) | 11           | 1.19 | 2                       | 0.055 | 0.046 |

397

*Abbreviations:* n, no. of hosts sampled; R, allelic richness;  $H_o$ , observed heterozygosity;  $H_e$ ,

398

expected heterozygosity

399

400 Mites from guanaco showed no significant deviations from the Hardy-Weinberg  
401 equilibrium (HWE), while mites from vicuña had significant HWE departures at SARM-33  
402 ( $P = 0.032$ ) and SARM-40 ( $P = 0.004$ ). AMOVA analysis showed the highest percentage of  
403 variance to occur within samples (57.7%,  $P = 0.04$ ) rather than between populations  
404 (6.35%,  $P = 0.01$ ). Pairwise  $F_{ST}$  values demonstrated both populations were closely related  
405 ( $F_{ST} = 0.054$ ,  $P = 0.025$ ).

406

## 407 **Discussion**

408 Sarcoptic mange is an emerging global wildlife disease. Recent reported cases worldwide  
409 reflect broad geographic spread, an increase in host species and greater virulence, and have  
410 been associated with population declines [6]. Here we report an outbreak of mange with a  
411 devastating effect on wild camelid populations within a protected area and its potential link  
412 with introduction of llama in the vicinity.

413

414 The impact of mange on the abundance of wild camelids in SGNP was severe. This study,  
415 which spanned a period of 26 months (February 2017 – April 2019), took place at an  
416 advanced stage of the epidemic, when the population reduction was most drastic. A decline  
417 in population densities of 67 and 77% for vicuña and guanaco, respectively, between May  
418 2017 and June 2018, coupled with the continuous decrease in individual counts through  
419 April 2019, reflect the near disappearance of these species from the park by the end of this  
420 study (Tables 1 and 2, Fig 3).

421

422 Despite the continuous numerical decrease of camelids in the park, mange persisted at the

423 end of this study, albeit at low rates. By April 2019, only one mange-infected vicuña in  
424 advanced clinical stage was found by doubling the length (24 km) of the Agüita del Indio  
425 transect (data not shown). This suggests that mechanisms independent of density were  
426 involved in transmission, such as frequency-dependent mechanisms (e.g. mating behavior),  
427 that allow a pathogen to continue to spread even when population size declines to the point  
428 of near local extinction [46, 47]. Indirect transmission through contact with contaminated  
429 objects [46, 48, 49] is also possible. In particular, the role of communal sites such as dust  
430 baths or other elements of the environment like shrubs (in this study it was observed that  
431 animals used hard vegetation to scratch) in the transmission of mange remain unknown.  
432 The severe hyperkeratotic or crusted clinical form of mange observed in this study is  
433 characterized by high load of mites and is thus highly contagious [50].

434

435 Mange-infected camelids were seen throughout the study period. However, the proportion  
436 of live affected animals may have been underestimated due to limitations in detection of  
437 early stages from distant observation. Conversely, the proportion of mange-infected  
438 carcasses was high despite examination of mostly limbs with skin remains, which may have  
439 missed infection in other parts of the body. The occurrence of mange in live vicuña was  
440 similar across age classes, but severity varied, and severe stages were not observed in crias.  
441 Because crias were seen nursing from severely ill mothers, it is possible that lack of  
442 maternal care led to mortality of this age class before mange progressed. A higher  
443 proportion of vicuña in advanced stage of the disease, at which there is visible difficulty in  
444 their movements, was seen in Llano de los Leones. It is possible that mange influenced the  
445 distribution pattern of sick animals which congregated in a few flooded meadows, where  
446 food and water were easily accessible. These sites are also the preferred hunting sites for

447 puma [51, 52], which may explain the steady numerical declines and the removal of  
448 animals before they reached severe stages of disease. Preliminary data show that the  
449 percentage of puma-killed camelids (n = 392) with mange lesions increased from 5 to 90%  
450 in 24 months at the outbreak onset (E. Donadio, unpublished data).

451

452 Spatially, the outbreak was initially detected in both SGNP and the larger SGPR. However,  
453 over time, infected camelids were observed in adjacent, outside park boundary areas. For  
454 example, mange-infected vicuña and guanaco were reported to the north of the park in 2016  
455 (La Brava Reserve in La Rioja province, Fig 1) and infected guanaco were seen to the  
456 northeast, in San Juan province in 2018. While vicuñas are naturally restricted to high  
457 altitude locations, guanacos in this region are migratory and more prone to overlap with  
458 livestock, and recently, with introduced llama. The altitudinal migration of guanaco in the  
459 Andean Mountain range is a reported phenomenon [53, 54]. Moreover, home ranges of  
460 1853 km<sup>2</sup> (185,000 ha) have been described for guanaco in Argentina [55], showing the  
461 biological capacity of this species to move over large areas and their potential to disperse  
462 mange if infected. Guanaco could have thus acted as a bridge species for the transmission  
463 of the mite during its migration towards the high Andes inhabited by vicuña.

464

465 Interviewed veterinarians reported that the only cases of mange near SGNP in the last 20  
466 years occurred in llama in 2009, when they were first introduced to San Juan province.  
467 Mange was specifically reported in a llama herd from Cieneguillas, Jujuy province, a site  
468 where mange is common in domestic and wild camelids [17]. The veterinarians reported  
469 that one of the infected llamas was treated for mange and then handed to a farmer in  
470 Malimán, who allowed his herd to graze freely and comingle with free-ranging guanaco.



471 This situation may have also occurred in the higher-altitude Lavadero, the ranger post  
472 adjacent to SGNP, where both vicuña and guanaco are present. The existence of more such  
473 sites of spatial overlap cannot be ruled out. From the extended interviews in San Juan, it is  
474 evident that at least in the last 50 years, mange had never been reported in wild camelids in  
475 the SGBR or its area of influence.

476

477 The guanaco and vicuña mites evaluated in this study presented highly homologous  
478 genotypes, being mostly monomorphic in all loci and most of them sharing the same alleles  
479 with very little genetic variability. The observed ( $H_o$ ) and expected ( $H_e$ ) heterozygosity in  
480 guanaco and vicuña mites remained within expected parameters, suggesting that they were  
481 in HWE. In HWE populations, allele and genotype frequencies are assumed to remain  
482 constant from generation to generation in the absence of other evolutionary influences  
483 (migration, mutation, selection, gene drift), suggesting that the mange epidemic described  
484 here originated from a single source and a single introduction event. Low genetic diversity  
485 is common in newly introduced pathogens [24] and consistent with the rapid spread of an  
486 emerging pathogen [25]. Unfortunately, at the time of our study there were no llama with  
487 mange in the area, which precluded us from further exploring this species as a source of  
488 mite introduction. Future studies should apply advanced molecular techniques (e.g. single  
489 nucleotide polymorphisms) to clarify the phylogenetic relationships, host preference of  
490 mites, mechanisms of propagation, and the source and origin of infestations [6, 56]. Such  
491 studies have informed on domestic animal sources in wildlife outbreaks [57] as well as on  
492 transmission between domestic and wild animals [58].

493

494 Regardless of the origin of the outbreak reported here, the most efficient management

495 approach going forward would be to avoid the presence of livestock within protected areas  
496 and to enforce adequate disease prevention and control practices in conservation units that  
497 allow livestock grazing. Health risks associated with movements of livestock near national  
498 parks are rarely considered in Argentina, and there is little communication between the  
499 conservation and agriculture sectors. Thus, livestock incentive programs like the one  
500 described here occur under a totally separate set of priorities, agencies, and legislation, with  
501 no overlap or consultation with the environmental sector. Moreover, sarcoptic mange is not  
502 a mandatory reportable disease in Argentina, so records on species and areas affected are  
503 not available.

504

505 The establishment of a llama breeding program, which included their introduction to the  
506 SGPR without previous consideration of the disease risks due to their taxonomic proximity  
507 with the native camelids protected there, plus the discontinuation of veterinary care for  
508 introduced animals, carried a high cost for vicuña and guanaco in SGNP. Despite this being  
509 a protected area, since the outbreak the local extinction of wild camelids in SGNP is a real  
510 possibility, with potential cascading ecological impacts at the community and ecosystem  
511 levels. Only science-based, comprehensive and multi-sectorial policies that bridge the  
512 environment and livestock sectors can herald a better future for the health of all species.

513

## 514 **Conclusions**

515 Sarcoptic mange had an epidemic behavior with a devastating effect on wild camelids at  
516 SGNP. At the end of this study, a scenario of high risk for local extinction of vicuña and  
517 guanaco in this protected area was evident. Several factors may have contributed to the

518 rapid spread of mange in SGNP, including a high sensitivity of the animals to the mite  
519 evidenced by a severe clinical form of the disease; the social nature and gregarious  
520 behavior of camelids; and the initial high densities of camelids in the park, which would  
521 have favored contact between individuals and significant spatio-temporal overlap between  
522 healthy and sick animals. Mange infection and high susceptibility to puma predation were  
523 determining factors in the population collapse observed.

524

525 A series of considerations support the hypothesis of the origin of the outbreak in introduced  
526 llama: a) from the interviews, two sites of spatio-temporal overlap between introduced  
527 llama and wild camelids were detected within and around SGBR; b) there were temporal  
528 coincidences between the launch of llama production in San Juan (2009-2014) and the  
529 detection of the first cases of mange in native camelids in the park (2014); c) sarcoptic  
530 mange is a frequent problem in llama in at least one of the sites of origin of the introduced  
531 animals (Cieneguillas); d) mange was diagnosed in some llama entering San Juan from  
532 Cieneguillas, and it is possible that further unnoticed cases occurred, either due to lack of  
533 reports or subclinical and/or mild infestations; e) interviews suggest that mange has not  
534 been a problem in livestock in the last 20 years in SGNP's area of influence, and no  
535 outbreaks of mange have been reported in native camelids in the area, at least in the last 50  
536 years; f) the genetic characteristics of the mites recovered from guanaco and vicuña suggest  
537 that it was a recent introduction, with no time to co-evolve with SGNP wild camelids,  
538 supporting that the mite is exogenous to the affected population; g) the aggressive and  
539 epidemic behavior in SGNP vicuña and guanaco suggests no prior contact with the disease  
540 (“naïve” population).

541

542 The transmission of diseases between wild and domestic animals will be an increasing  
543 challenge at the interface. In Argentina, sarcoptic mange is not notifiable in livestock, but  
544 should be considered by the national veterinary service so that efficient disease control  
545 mechanisms are implemented in interprovincial animal movements, particularly when they  
546 involve protected areas. Proper sanitary management of domestic animals will always be a  
547 more reasonable and feasible strategy than trying to contain epidemics in wild populations.  
548 With the loss of the largest and main herbivores in the SGNP system, large ecosystem-wide  
549 changes are expected in the park. Long-term monitoring will provide valuable information  
550 to assess the resilience of the system in response to disease-driven extinction of key  
551 species.

552

## 553 **Acknowledgments**

554 We are grateful to personnel of San Guillermo National Park and Administración de  
555 Parques Nacionales for logistical support during fieldwork. We extend our gratitude to  
556 technicians from the Secretaría de Ambiente y Desarrollo Sustentable of San Juan Province  
557 for the information provided, and to llama producers for their collaboration. We thank the  
558 Master's Program in Wildlife Management from Facultad de Ciencias Exactas, Físicas y  
559 Naturales de la Universidad de Córdoba Argentina, for assisting with the export of samples.  
560 Special thanks to J. Riner and K. Clark for their assistance in molecular analysis, and to  
561 veterinarian R. Camera and those interviewed during this study for sharing their  
562 knowledge. We thank volunteers F. Vacafior and P. Muñoz for assistance in the field.

563

## 564 **References**

- 565 1. Daszak P, Cunningham A A, Hyatt AD. Emerging infectious diseases of wildlife--  
566 threats to biodiversity and human health. *Science*. 2000; 287 (5452), 443-449.  
567 <https://doi.org/10.1126/science.287.5452.443>
- 568 2. Thorne ET, Williams ES. Disease and endangered species: the black-footed ferret as a  
569 recent example. *Conserv Biol*.1988; 2 (1), 66-74.  
570 <https://doi.org/10.1111/j.1523-1739.1988.tb00336.x>
- 571 3. Goltsman M, Kruchenkova EP, Macdonald DW. The Mednyi Arctic foxes: treating a  
572 population imperiled by disease. *Oryx*.1996; 30 (4): 251-258.  
573 <https://doi.org/10.1017/S003605300021748>
- 574 4. Wyatt KB, Campos P F, Gilbert M T P, Kolokotronis SO, Hynes WH, DeSalle R, et al.  
575 Historical mammal extinction on Christmas Island (Indian Ocean) correlates with  
576 introduced infectious disease. *PloS one*.2008; 3c (11), e3602.  
577 <https://doi.org/10.1371/journal.pone.0003602>
- 578 5. Frick WF, Pollock JF, Hicks AC, Langwig KE, Reynolds DS, Turner GG, et al. An  
579 emerging disease causes regional population collapse of a common North American bat  
580 species. *Science*. 2010; 329 (5992), 679-682. <https://10.1126/science.1188594>
- 581 6. Escobar LE, Carver S, Cross, PC, Rossi L, Almberg ES, Yabsley, et al. Sarcoptic  
582 mange: An emerging panzootic in wildlife. *Transbound Emerg Dis*. 2021; 00:1-16.  
583 <https://doi.org/10.1111/tbed.14082>.
- 584 7. Bornstein S, Mörner T, Samuel WM. *Sarcoptes scabiei* and sarcoptic mange. In:  
585 *Parasitic Disease of Wild Mammals*. 2nd edn. Samuel WM, Pybus MJ, and Kocan AA.  
586 (Eds). Ames: Iowa State University Press; 2001. pp. 107–119. ISBN: 081382978X
- 587 8. Pence DB, Ueckermann E. Sarcoptic mange in wildlife. *Rev Sci Tech* 2002; 21 (2):  
588 385-398.

- 589 <http://dx.doi.org/10.20506/rst.21.2.1335>
- 590 9. Carvalho J, Granados JE, López-Olvera JR, Cano-Manuel FJ, Pérez JM, Fandos P, et al.  
591 Sarcoptic. Sarcoptic mange breaks up bottom-up regulation of body condition in a large  
592 herbivore population. *Parasit Vectors*. 2015; 8 (1): 1-9.  
593 <https://doi.org/10.1186/s13071-015-1188-4>
- 594 10. Simpson K, Johnson CN, Carver S. *Sarcoptes scabiei*: the mange mite with mighty  
595 effects on the common wombat (*Vombatus ursinus*). 2016, PLoS One (11) 3 e0149749.  
596 <https://doi.org/10.1371/journal.pone.0153997>
- 597 11. Astorga F, Carver S, Almberg ES, Sousa GR, Wingfield K, Niedringhaus KD, et al.  
598 International meeting on sarcoptic mange in wildlife, June 2018, Blacksburg, Virginia,  
599 USA. *Parasit Vectors*. 2018; 11:449.  
600 <https://doi.org/10.1186/s13071-018-3015-1>
- 601 12. León-Vizcaíno L, Ruíz de Ybáñez MR, Cubero MJ, Ortíz JM, Espinosa J, Pérez L, et al.  
602 Sarcoptic mange in Spanish ibex from Spain. *J Wildl Dis*. 1999; 35 (4): 647-659.  
603 <https://doi.org/10.7589/0090-3558-35.4.647>.
- 604 13. Rossi L, Fraquelli C, Vesco U, Permunion R, Somnavilla GM, Carmignola G, et al.  
605 Descriptive epidemiology of a scabies epidemic in chamois in the Dolomite Alps, Italy.  
606 *Eur J Wildl Res*. 2007; 53 (2): 31-141. <https://doi.org/10.1007/s10344-006-0067-x>
- 607 14. Lavín S, Ruiz-Bascaran M, Marco I, Fondevila MD, Ramis AJ. 2000. Experimental  
608 infection of chamois (*Rupicapra pyrenaica parva*) with *Sarcoptes scabiei* derived from  
609 naturally infected goats. *J Vet Med. Series B*. 2000; 47 (9): 693-699.  
610 <https://doi.org/10.1046/j.1439-0450.2000.00406.x>.
- 611 15. Alvarado L, Skewes O, Brevis C. Estudio de sarna clínica en guanaco (*Lama guanicoe*)  
612 silvestre, en el sector centro-sur de Isla Tierra del Fuego, Chile. Tesis MV, Facultad de

- 613 Medicina Veterinaria, Universidad de Concepción, Chillán, Chile (2004)
- 614 16. Beltrán-Saavedra LF, Nallar-Gutiérrez R, Ayala G, Limachi JM, Gonzales-Rojas JL.  
615 Health assessment of free-ranging vicuñas of the National Integrated Management  
616 Natural Area Apolobamba, Bolivia. *Ecología en Bolivia*. 2011; 46 (1): 14-27.  
617 [http://www.scielo.org.bo/scielo.php?script=sci\\_arttext&pid=S1605-](http://www.scielo.org.bo/scielo.php?script=sci_arttext&pid=S1605-25282011000100003&lng=es%22)  
618 [25282011000100003&lng=es%22](http://www.scielo.org.bo/scielo.php?script=sci_arttext&pid=S1605-25282011000100003&lng=es%22)
- 619 17. Arzamendia Y, Neder LE, Marcoppido G, Ortiz F, Arce M, Lamas HE, et al. Effect of  
620 the prevalence of ectoparasites in the behavioral patterns of wild vicuñas (*Vicugna*  
621 *vicugna*). *J Camelid Sci*. 2012; 5: 105-117. <http://www.isocard.net/en/journal/detail/54>
- 622 18. Bujaico N, Zuñiga M. Control y tratamiento de sarna (Escabiosis) en vicuñas de la  
623 comunidad campesina de Lucanas – Reserva Nacional de Pampa Galeras. Ayacucho  
624 Perú. *Revista Ciencia y Desarrollo*. 2015; 18 (2): 31-36.  
625 <http://dx.doi.org/10.21503/cyd.v18i2.1075>
- 626 19. Laker J, Baldo JL, Arzamendia Y, Yacobaccio H. La vicuña en los Andes. (Ed. B. Vilá)  
627 In: Investigación, conservación y manejo de vicuñas, Proyecto Macs, Buenos Aires,  
628 Argentina; 2006. pp 37-50. ISBN: 987-22888-0-1  
629 <http://dx.doi.org/10.21503/CienciayDesarrollo.2015.v18i2.04>
- 630 20. Carmanchahi PD, Panebianco A, Leggieri L, Barri F, Marozzi A, Flores C, et al. *Lama*  
631 *guanicoe*. En: SAyDS–SAREM (eds.) Categorización 2019 de los mamíferos de  
632 Argentina según su riesgo de extinción. Lista Roja de los mamíferos de Argentina. 2019  
633 <https://cma.sarem.org.ar/es/especie-nativa/lama-guanicoe>
- 634 21. Arzamendia Y, Acebes P, Baldo JL, Rojo V, Segovia JM. *Vicugna vicugna*. En:  
635 SAyDS–SAREM (eds.) Categorización 2019 de los mamíferos de Argentina según su  
636 riesgo de extinción. Lista Roja de los mamíferos de Argentina, 2019. Versión

- 637 <http://cma.sarem.org.ar/es/especie-nativa/vicugna-vicugna>
- 638 22. Martínez Carretero E, Damiani O A, Acosta JC, Villavicencio HJ, Marinero JA, García  
639 A, et al. Diversidad biológica y cultural de los altos Andes centrales de Argentina: línea  
640 de base de la reserva de biosfera San Guillermo, San Juan. Editor: Martínez Carretero,  
641 E,(ed) 1a ed.- San Juan : Univ. Nacional de San Juan, 2007. ISBN 978-950-605-528-8  
642 Available from: <https://www.researchgate.net/publication/230746040>
- 643 23. Ferreyra H, Donadío E, Uhart M. Box 10.1. Un brote de sarna sarcóptica diezma las  
644 vicuñas del Parque Nacional San Guillermo, Argentina. En González, B.A. (ed.). *La*  
645 *Vicuña Austral*, pp i-ii. Facultad de Ciencias Forestales y de la Conservación de la  
646 Naturaleza, Corporación Nacional Forestal y Grupo Especialista en Camélidos  
647 Sudamericanos Silvestres. Santiago, Chile. 2020. pp 202 I.S.B.N.: 978-956-7669-74-5
- 648 24. Gladieux P, Feurtey A, Hood ME, Snirc A, Clavel J, Dutech C, et al. The population  
649 biology of fungal invasions. *Mol Ecol*. 2015; 24 (9): 1969-1986.  
650 <https://doi.org/10.1111/mec.13028>
- 651 25. Drees KP, Parise KL, Rivas SM, Felton LL, Puechmaille SJ, Keim P, et al.  
652 Characterization of microsatellites in *Pseudogymnoascus destructans* for white-nose  
653 syndrome genetic analysis. *J Wildl Dis*. 2017; 53(4): 869-874.  
654 <https://doi.org/10.7589/2016-09-217>
- 655 26. Decree 1492/15. Creación del Programa Camélidos de los Andes. Ministerio de  
656 Producción y Desarrollo Económico, Gobierno de San Juan.  
657 <https://minio.legsanjuan.gob.ar/normasconsolidaciones/2399/DR-1492-2015%20J.PDF>
- 658 27. Salvioli G. Caracterización hidrometeorológica. In: Diversidad biológica y cultural de  
659 los altos Andes centrales de Argentina—línea de base de la Reserva de Biosfera San  
660 Guillermo, San Juan (E. Martínez Carretero, ed.). Editorial Fundación Universidad



- 661 Nacional de San Juan, San Juan, Argentina; 2007. pp 63-87. ISBN 978-950-605-528-8
- 662 28. Donadio E, Buskirk SW. 2016. Linking predation risk, ungulate antipredator responses,  
663 and patterns of vegetation in the high Andes. *J Mammal.* 2016; 97 (3): 966-977.  
664 <https://doi.org/10.1093/jmammal/gyw020>
- 665 29. Puig S, Videla F. Distribución, densidades y estado de conservación de los camélidos.  
666 In: *Diversidad biológica y cultural de los altos Andes centrales de Argentina—Línea de*  
667 *base de la Reserva de Biosfera San Guillermo*, San Juan (E. Martínez Carretero, ed.).  
668 Fundación Universidad Nacional de San Juan, San Juan, Argentina; 2007. pp 197-223.  
669 ISBN 978-950-605-528-8.
- 670 30. Wurstten A, Novaro AJ, Walker R.S. Habitat use and preference by guanacos, vicuñas,  
671 and livestock in an altitudinal gradient in northwest Argentina. *Eur J Wildl Res.* 2014;  
672 60, 35–43. <https://doi.org/10.1007/s10344-013-0748-1>
- 673 31. Thomas L, Laake JL, Strindberg S, Marques FFC, Buckland ST, Borchers DL, et al.  
674 Distance 5.0. Release “x”1. Research Unit for Wildlife Population Assessment,  
675 University of St. Andrews, UK; 2010. <http://www.ruwpa.st-and.ac.uk/distance/>
- 676 32. Moroni B, Angelone S, Pérez JM, Min ARM, Pasquetti M, Tizzani, P, et al. Sarcoptic  
677 mange in wild ruminants in Spain: solving the epidemiological enigma using  
678 microsatellite markers. *Parasit Vectors.* 2021; 14 (1): 1-10.  
679 <https://doi.org/10.1186/s13071-021-04673-x>
- 680 33. Fain A. Epidemiological problems of scabies. *Int J Dermatol.*1978; 17: 20-31.  
681 <https://doi.org/10.1111/j.1365-4362.1978.tb06040.x>
- 682 34. Van Saun, R. J. (2009). Nutritional requirements and assessing nutritional status in  
683 camelids. *Vet Clin North Am Food Anim Pract.* 2009; 25(2): 265-279.  
684 <https://doi.org/10.1016/j.cvfa.2009.03.003>

- 685 35. Puig S, Monge S. Determinación de la edad en *Lama guanicoe* (Müller). *Deserta*.1983;  
686 7: 246-270.  
687 [https://www.researchgate.net/publication/286787043\\_Determinacion\\_de\\_la\\_edad\\_en\\_L](https://www.researchgate.net/publication/286787043_Determinacion_de_la_edad_en_L)  
688 [ama\\_guanicoe\\_Muller](https://www.researchgate.net/publication/286787043_Determinacion_de_la_edad_en_Lama_guanicoe_Muller)
- 689 36. Rasero R, Rossi L, Soglia D, Maione S, Sacchi P, Rambozzi L, et al. Host taxon-derived  
690 *Sarcoptes* mite in European wild animals revealed by microsatellite markers. *Biol*  
691 *Conserv*. 2010 143:1269-77. <https://doi.org/10.1016/j.biocon.2010.03.001>
- 692 37. Toonen RJ, Hughes S. Increased throughput for fragment analysis on an ABI Prism®  
693 377 automated sequencer using a membrane comb and STRand software. *Biotechniques*.  
694 2001; 31 (6):1320-1325. PMID: 11768661.
- 695 38. Alberto F. MsatAllele\_1. 0: An R package to visualize the binning of microsatellite  
696 alleles. *J Hered*. 2009; 100 (3): 394-397. <https://doi.org/10.1093/jhered/esn110>
- 697 39. Coombs JA, Letcher BH, Nislow KH. CREATE: a software to create input files from  
698 diploid genotypic data for 52 genetic software programs. *Mol Ecol Resour*. 2008; 8 (3),  
699 578-580.<https://doi.org/10.1111/j.1471-8286.2007.02036.x>
- 700 40. Peakall R, Smouse P. GenAEx 6.5: genetic analysis in Excel. Population genetic  
701 software for teaching and research-an update. *Mole Ecol Notes*. 2012; 28: 2537-9.  
702 <https://doi.org/10.1111/j.1471-8286.2005.01155.x>
- 703 41. Kalinowski ST. User's Manual for ML-Relate. Department of Ecology Montana State  
704 University Bozeman, MT, 2008, vol. 59717.  
705 <http://www.montana.edu/kalinowski/Software/ONCOR.html>
- 706 42. R Core Team. R: A Language and Environment for Statistical Computing. R Foundation  
707 for Statistical Computing, Vienna; 2018. <https://www.R-project.org>.
- 708 43. Adamack AT, Gruber B. PopGenReport: simplifying basic population genetic analyses in

- 709 R. *Methods Ecol Evol.* 2014; 5(4): 384-387.  
710 <https://doi.org/10.1111/2041-210X.12158>
- 711 44. Kamvar ZN, Tabima JF, Grünwald NJ. Poppr: an R package for genetic analysis of  
712 populations with clonal, partially clonal, and/or sexual reproduction. *PeerJ.* 2014; 2,  
713 e281. <https://doi.org/10.7717/peerj.281>
- 714 45. Van Oosterhout C, Hutchinson WF, Wills DP, Shipley P. MICRO-CHECKER: software  
715 for identifying and correcting genotyping errors in microsatellite data. *Mol Ecol Notes.*  
716 2004; 4 (3): 535-538. <https://doi.org/10.1111/j.1471-8286.2004.00684.x>
- 717 46. McCallum H, Jones M, Hawkins C, Hamede R, Lachish S, Sinn DL, et al. Transmission  
718 dynamics of Tasmanian devil facial tumor disease may lead to disease-induced  
719 extinction. *Ecology.* 2009; 90: 3379–3392.  
720 <https://doi.org/10.1890/08-1763.1>
- 721 47. Foley J, Serieys LEK, Stephenson N, Riley S, Foley C, Jennings M, et al. A synthetic  
722 review of notoedres species mites and mange. *Parasitology.* 2016; 143 (14): 1847-1861.  
723 <https://doi.org/10.1017/S0031182016001505>
- 724 48. Smith HJ. Transmission of *Sarcoptes scabiei* in swine by fomites. *Can Vet J.* 1986; 27  
725 (6):c252-254. PMID: 17422671; PMCID: PMC1680258.  
726 <https://pubmed.ncbi.nlm.nih.gov/17422671/>
- 727 49. Devenish-Nelson ES, Richards SA, Harris S, Soulsbury C, Stephens PA. Demonstrating  
728 frequency-dependent transmission of sarcoptic mange in red foxes. *Biol lett.* 2014; 10  
729 (10): 20140524. <https://doi.org/10.1098/rsbl.2014.0524>
- 730 50. Mounsey KE, Murray HC, King M, Oprescu F. Retrospective analysis of institutional  
731 scabies outbreaks from 1984 to 2013: lessons learned and moving forward. *Epidemiol  
732 Infec.* 2016; 144 (11): 2462 - 2471. <https://doi.org/10.1017/s0950268816000443>

- 733 51. Smith JA, Donadio E, Pauli JN, Sheriff MJ, Licitante OR, Middleton, AD. Habitat  
734 complexity mediates the predator–prey space race. *Ecology*. 2019. 100 (7): e02724.  
735 <https://doi.org/10.1002/ecy.2724>
- 736 52. Smith JA, Donadio E, Bidder OR, Pauli JN, Sheriff MJ, Perrig PL, et al. Where and  
737 when to hunt? Decomposing predation success of an ambush carnivore. *Ecology*. 2020;  
738 101 (12):e03172. <https://doi.org/10.1002/ecy.3172>
- 739 53. Ortega IM. 1985. Social organization and ecology of a migratory guanaco population in  
740 southern Patagonia. Master Thesis, Iowa St. Univ.; 1985. pp 56.  
741 Available from <https://lib.dr.iastate.edu/rtd/17816>
- 742 54. Contreras M, González B, Novoa F. Patrón de migración altitudinal y rango de hogar de  
743 guanacos en un ambiente andino del centro norte de Chile. In: Camano A, Castilla JC,  
744 Simonetti JA, (Eds.). *Minería y Biodiversidad*. Chile; 2006. pp. 81–91.
- 745 55. Bolgeri MJ. Caracterización de movimientos migratorios en guanacos (*Lama guanicoe*)  
746 y patrones de depredación por pumas (*Puma concolor*) en la Payunia, Mendoza.  
747 Doctoral thesis, 2017. pp 238. Available from:  
748 <http://rdi.uncoma.edu.ar:8080/handle/123456789/164>
- 749 56. Arlian LG, Morgan MS. A review of *Sarcoptes scabiei* past, present and future. *Parasit*  
750 *Vectors*. 2017; 10 (1): 297. <https://doi.org/10.1186/s13071-017-2234-1>
- 751 57. Fraser TA, Charleston M, Martin A, Polkinghorne A, Carver S. The emergence of  
752 sarcoptic mange in Australian wildlife: an unresolved debate. *Parasit Vectors*. 2016; 29:  
753 316. <https://doi.org/10.1186/s13071-016-1578-2>
- 754 58. Matsuyama R, Yabusaki T, Kuninaga N, Morimoto T, Okano T, Suzuki M, et al.  
755 Coexistence of two different genotypes of *Sarcoptes scabiei* derived from companion  
756 dogs and wild raccoon dogs in Gifu, Japan: The genetic evidence for transmission

757        between domestic and wild canids. *Vet parasitol.* 2015; 212 (3): 356-360.

758        <https://doi.org/10.1016/j.vetpar.2015.06.023>

759

## 761 **Supporting Information**

762

763 **Table S1: Mange detection survey effort (km) per transect in each month. The Agüita**  
764 **del Indio transect was not surveyed on May 2017 due to road blockage by excessive**  
765 **snow.**

766

767 **Table S2: Odds ratio (level A relative to level B) of different variables with regards to**  
768 **the occurrence of mange in live vicuña (*Vicugna vicugna*). Asterisks indicate**  
769 **significant differences among levels.**

770

771 **Table S3: Odds ratio (level A relative to level B) of different variables with regards to**  
772 **the occurrence of different clinical stages of mange in live vicuña (*Vicugna vicugna*).**  
773 **Asterisks indicate significant differences among levels.**

774

775 **Figure S1: Histology from vicuña (*Vicugna vicugna*) and guanaco (*Lama guanicoe*)**  
776 **carcasses revealed typical sarcoptic mange lesions with abundant mites in all**  
777 **specimens. (A) Epidermis with marked hyperkeratosis: 1- Keratin sheets, 2-Presence**  
778 **of parasites in the stratum corneum, 3- Mixed inflammatory infiltrate in the dermis**  
779 **(10x). (B) 1- Mite in the hyperplastic stratum corneum, 2- dermal collagen sclerosis, 3-**  
780 **sebaceous gland hyperplasia (20x). (C) 1-Plasmacytes, 2- Necrotic material and**  
781 **pustule. Necrotic remains of neutrophils in stratum corneum, 3- Macrophage (40 x).**  
782 **(D) Epidermis with marked hyperkeratosis, 1- Presence of parasite in the stratum**  
783 **corneum, 2- Keratin sheets and remains of scab material, 3- Mixed inflammatory**

784 **infiltrate in the dermis (10 x).**

785

786 **Figure S2: A and B: Llama (*Lama glama*) with alopecic scaling and crusts on**  
787 **forelimbs indicative of sarcoptic mange (Photo: M. Ciallela). These photographs were**  
788 **taken upon arrival of llama to Rodeo (San Juan province) from Cieneguillas (Jujuy**  
789 **province) in 2009.**

790

791 **Table S4: Chi-square test summary comparing observed and expected heterozygosis**  
792 **for the Hardy-Weinberg equilibrium in mites from guanaco (*Lama guanicoe*) and**  
793 **vicuña (*Vicugna vicugna*).**

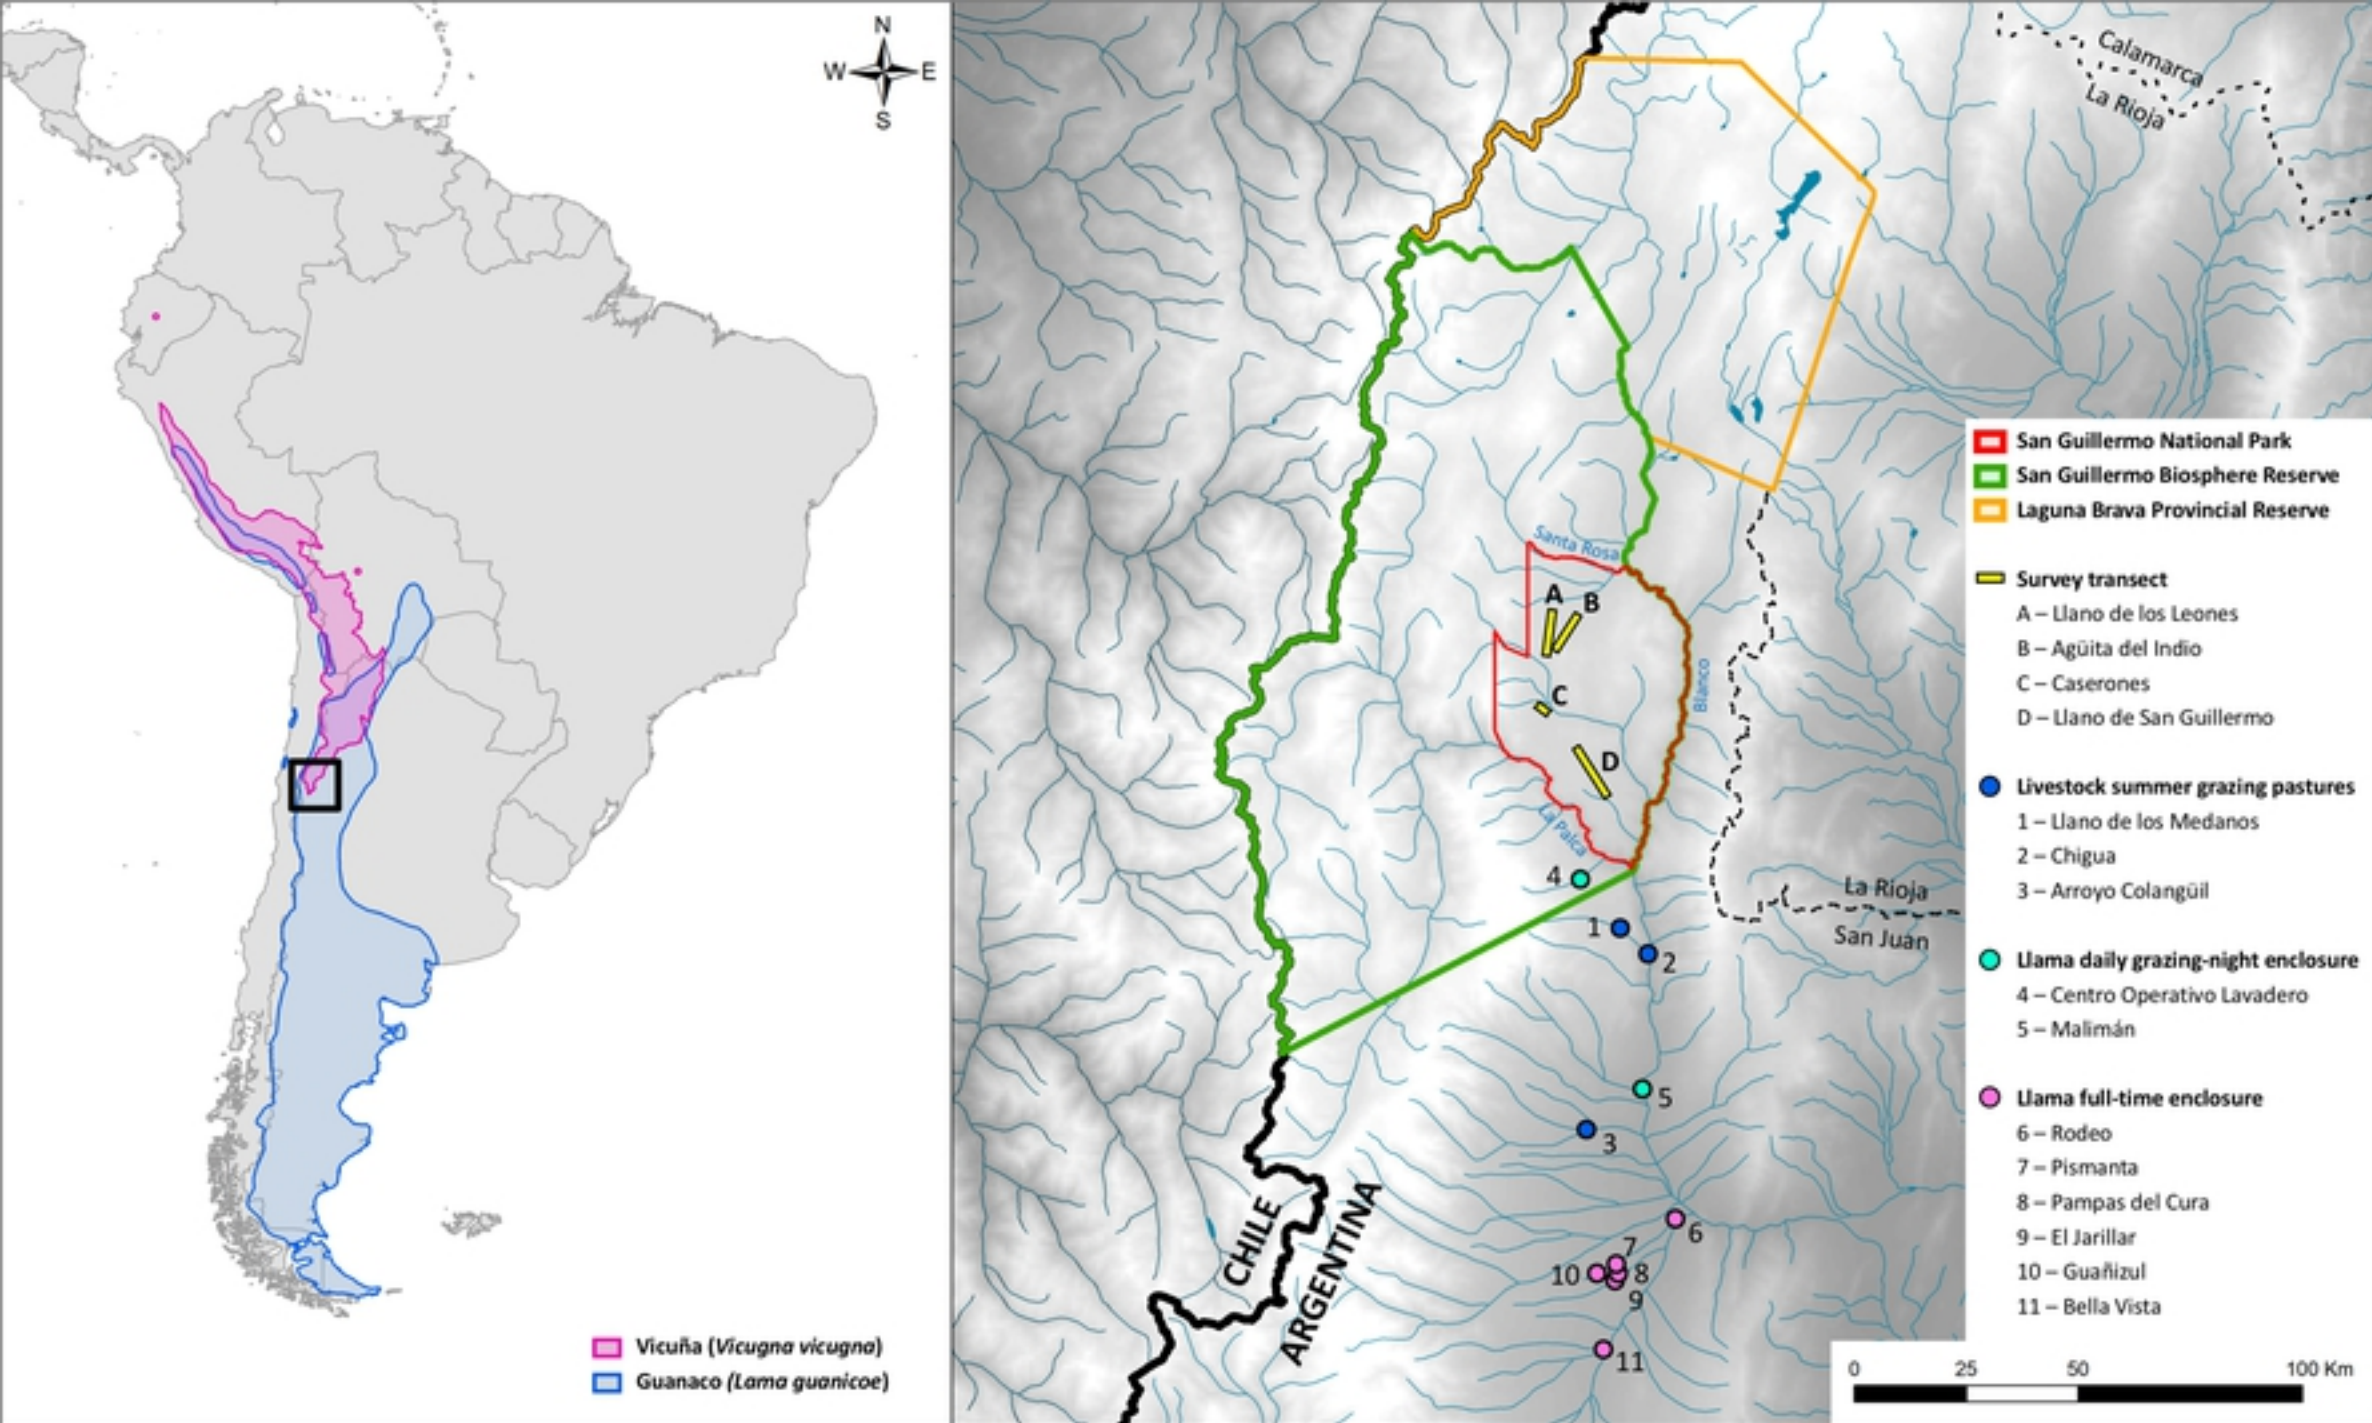

Figure 1



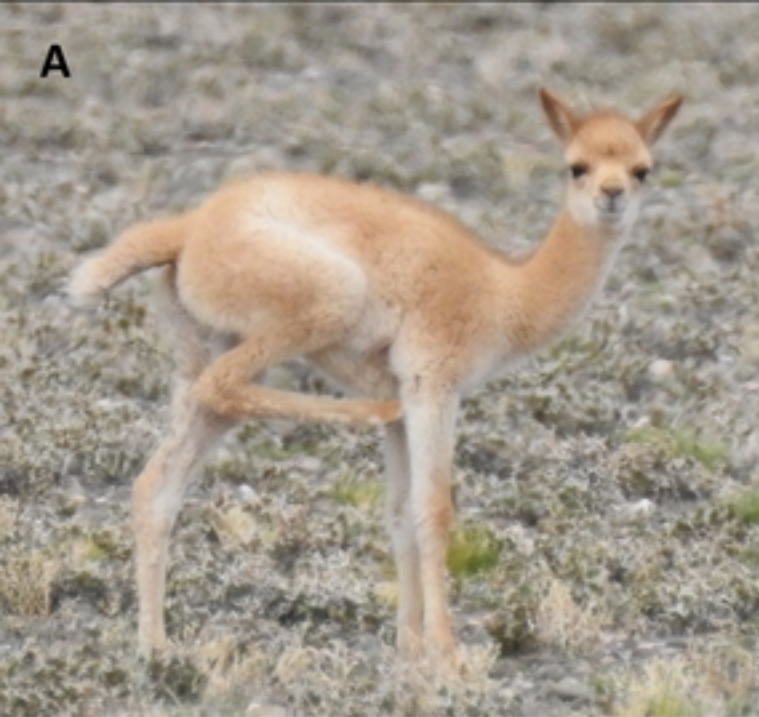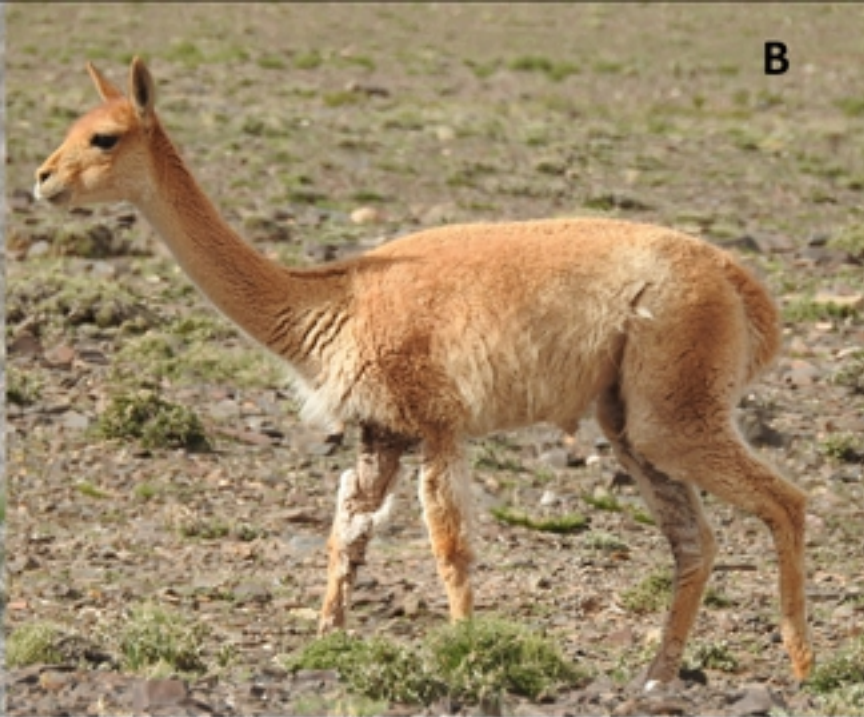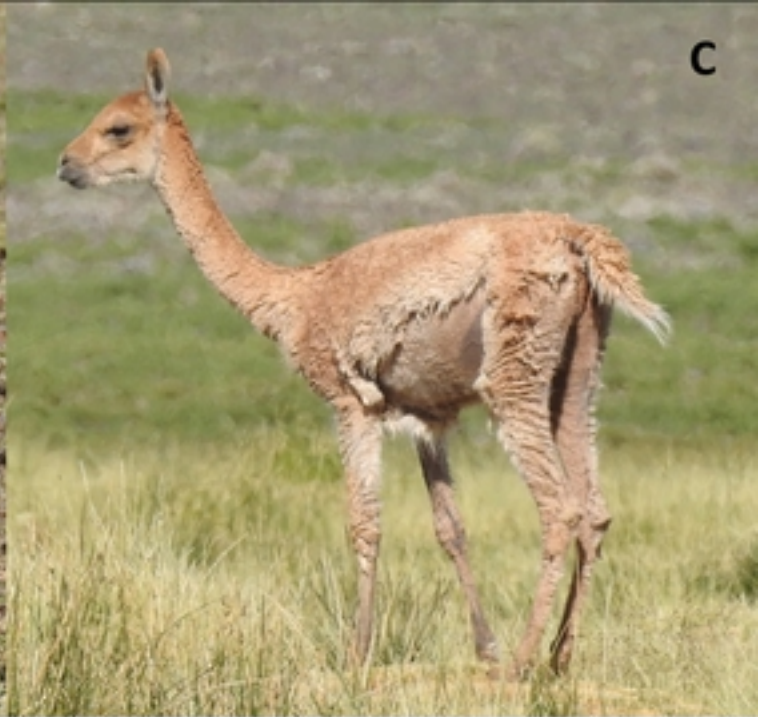

Figure 2

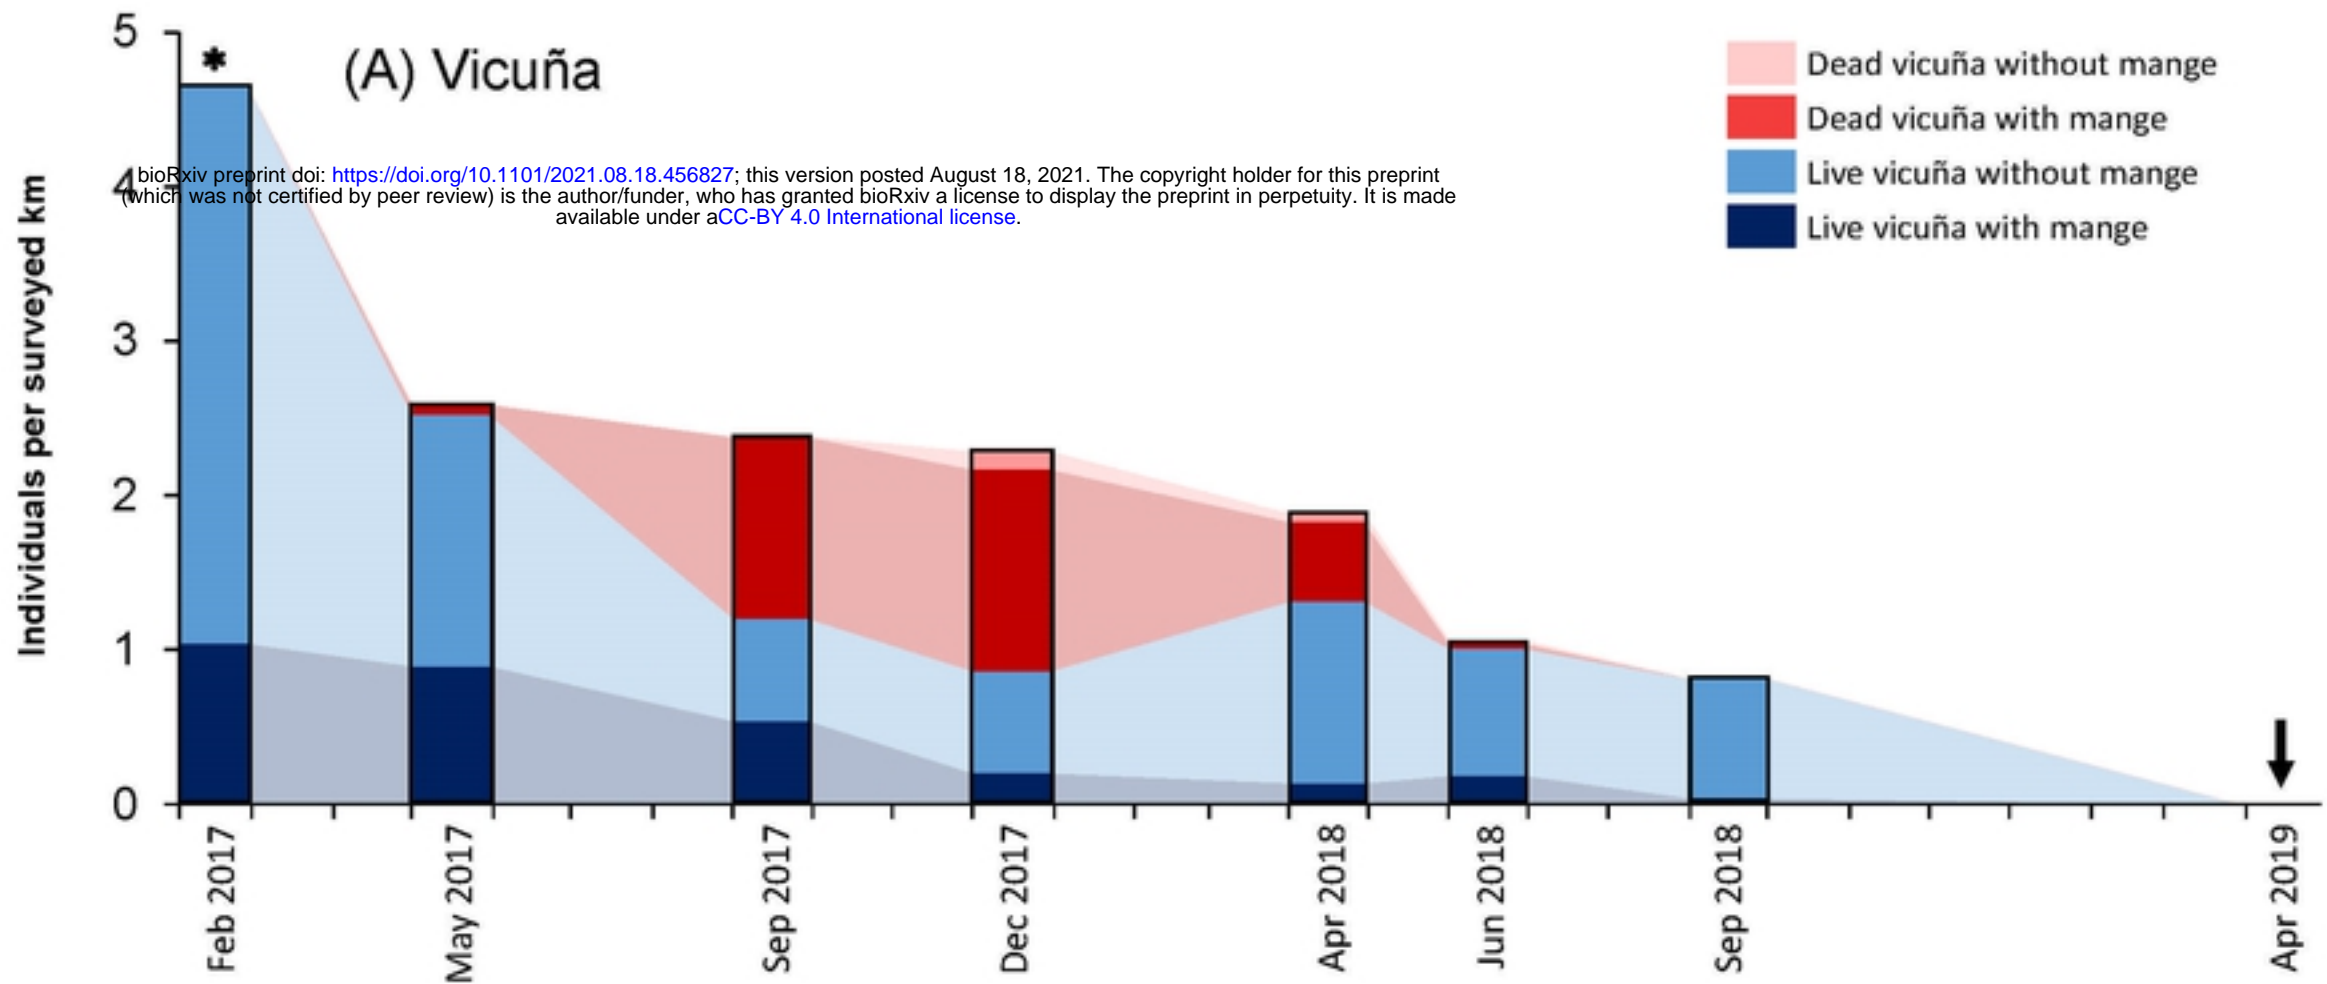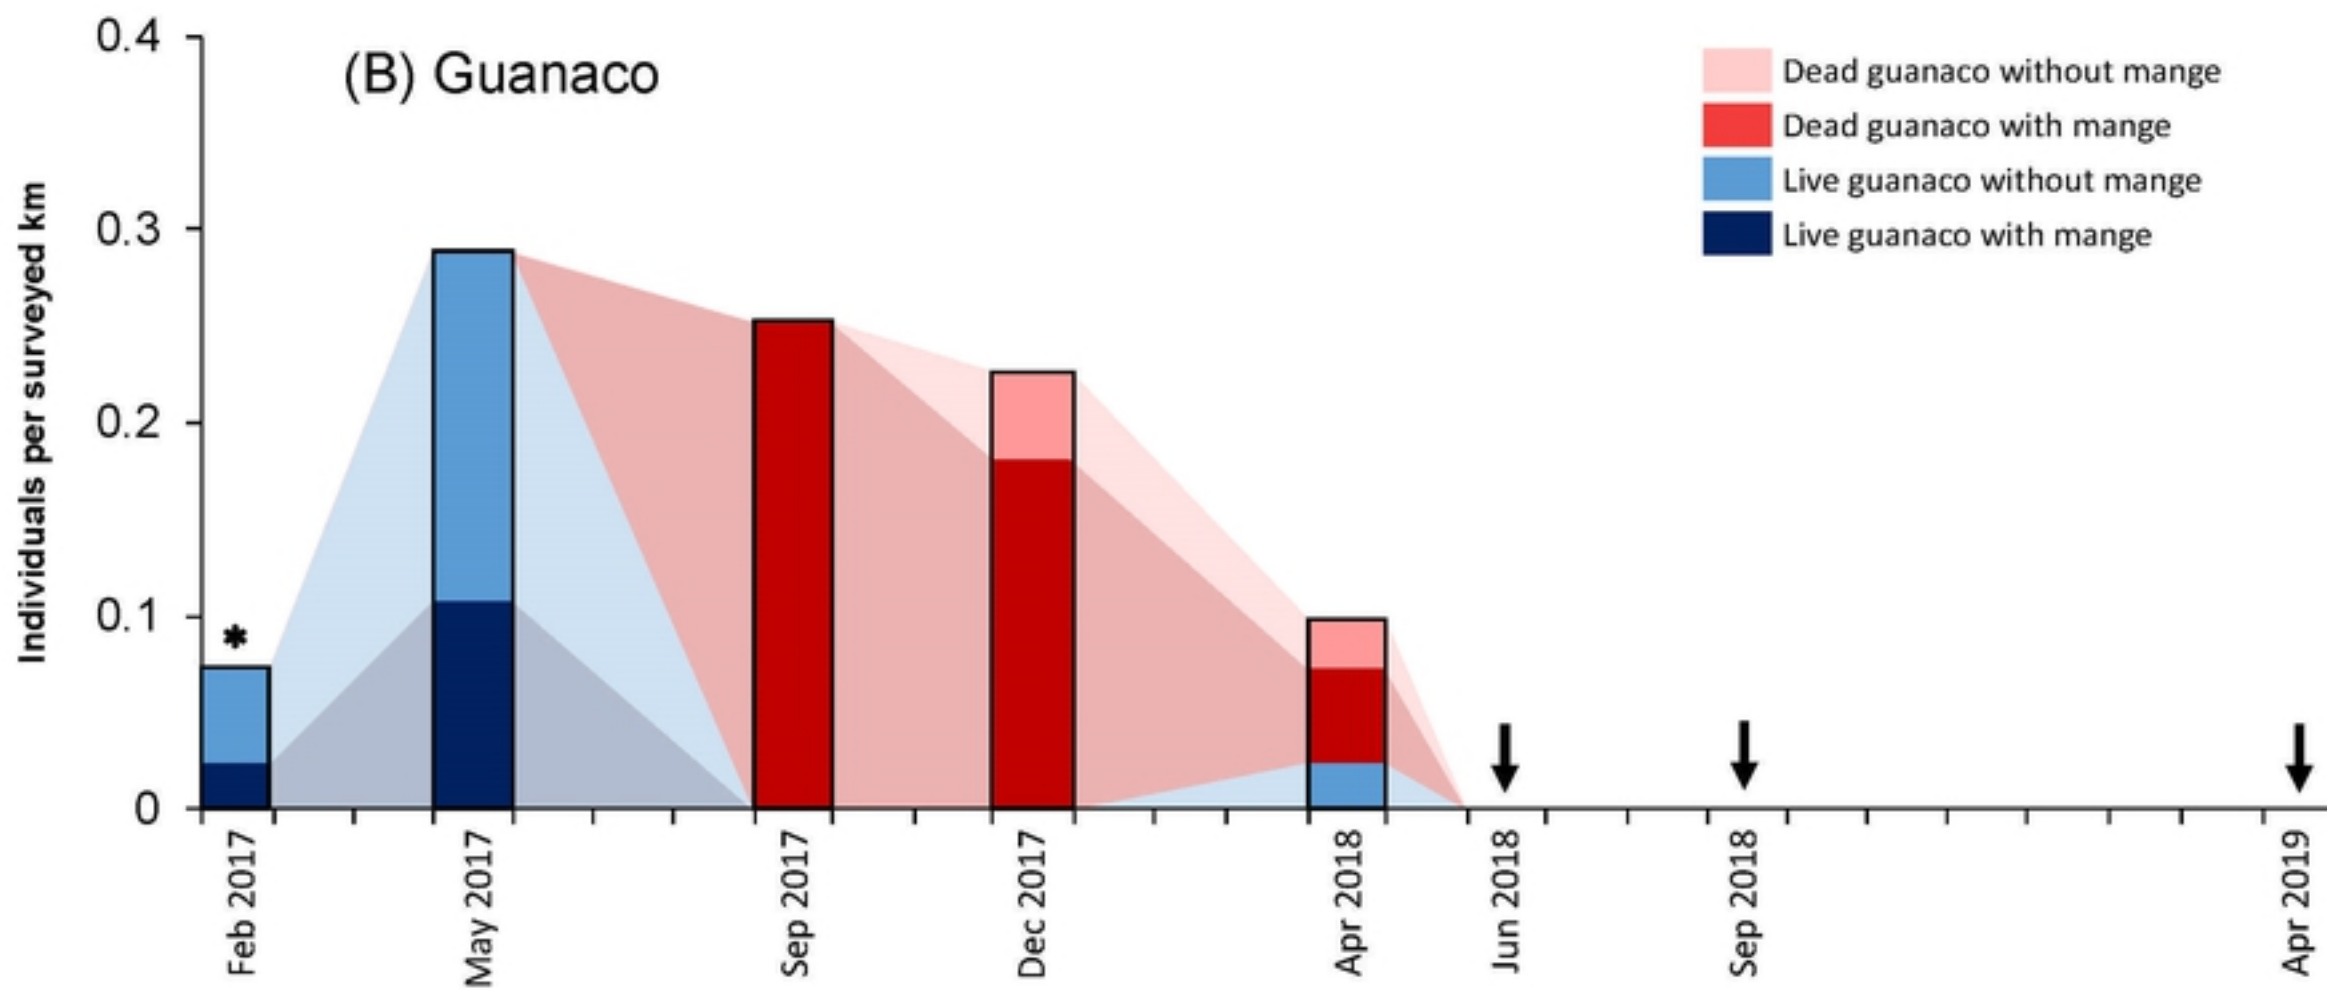

Figure 3

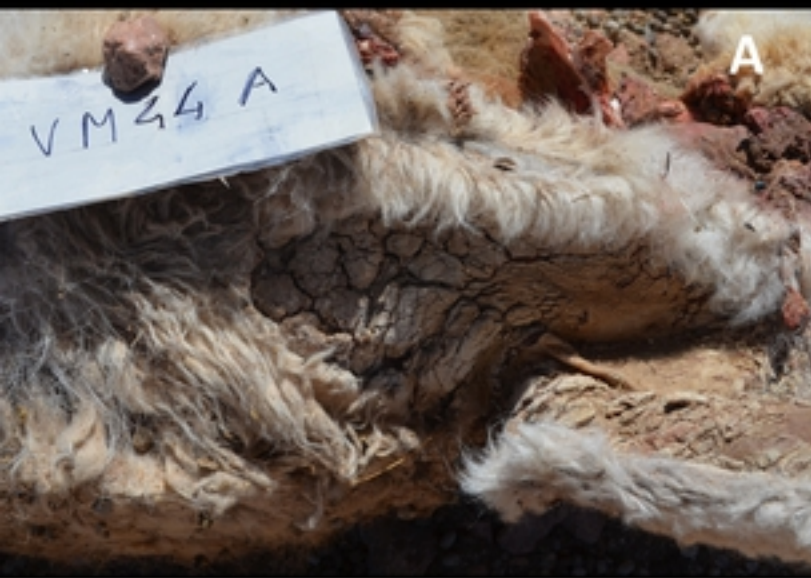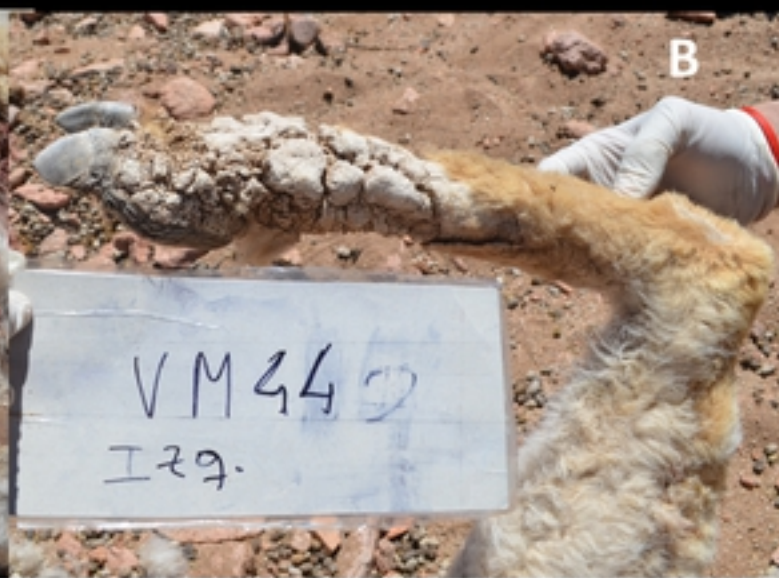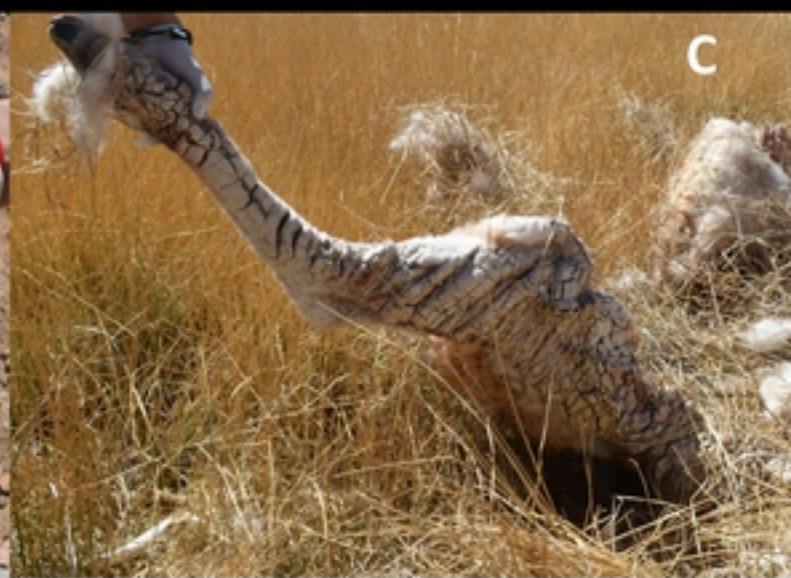

Figure 4
